# Supplementary material for: Synthesis of a novel trinuclear palladium complex: the influence of an oxime chelate ligand on biological evaluation towards double-strand DNA, BSA protein and molecular modeling studies
Source: Royal Society of Chemistry journal article supplement (doi:10.1039/c6ra08744b), 2016-01-01

## Supporting Information

### Synthesis of a novel trinuclear palladium complex: The influence of oxime chelate ligand on biological evaluation towards double-strand DNA, BSA protein and molecular modeling studies

Kazem Karami\*<sup>a</sup>, Zohreh Mehri Lighvan<sup>a</sup>, Ali Mohammad Alizadeh\*<sup>b</sup>, Marziyeh Poshteh-Shirani<sup>a</sup>, Taghi Khayamian<sup>a</sup>, Janusz Lipkowski<sup>c</sup>

<sup>a</sup>Department of Chemistry, Isfahan University of Technology, Isfahan, 84156/83111, Iran

<sup>b</sup>Cancer Research Center, Tehran University of Medical Science, Tehran, Iran, P.O: 1419733141.

<sup>c</sup>Institute of Physical Chemistry, Polish Academy of Sciences, Kasprzaka 44/52, 01-224 Warsaw, Poland

### Supporting Information

**Table. S1.** Crystallographic data and structure refinement details for Pd complex

**Figure. S1.** IR spectra of trinuclear Pd complex

**Figure. S2.** <sup>1</sup>H-NMR spectra of trinuclear Pd complex in CDCl<sub>3</sub>.

**Figure. S3.** <sup>13</sup>C {<sup>1</sup>H} NMR spectra of trinuclear Pd complex in CDCl<sub>3</sub>

**Table S1.** Crystallographic data and structure refinement details for Pd complex

| <b>Compound</b>                             | <b>Complex</b>                                                                                |
|---------------------------------------------|-----------------------------------------------------------------------------------------------|
| Empirical formula                           | C <sub>81</sub> H <sub>51</sub> Cl <sub>9</sub> N <sub>6</sub> O <sub>6</sub> Pd <sub>3</sub> |
| Formula weight                              | 1842.53                                                                                       |
| Crystal system                              | Monoclinic                                                                                    |
| Space group                                 | P21/n                                                                                         |
| a / Å                                       | 21.2784 (4)                                                                                   |
| b / Å                                       | 17.2413 (3)                                                                                   |
| c / Å                                       | 21.3529 (3)                                                                                   |
| β / °                                       | 113.452 (2)                                                                                   |
| V / Å <sup>3</sup>                          | 7186.6 (2)                                                                                    |
| T / K                                       | 100 (1)                                                                                       |
| Z                                           | 4                                                                                             |
| ρ <sub>calc</sub> / g cm <sup>-3</sup>      | 1.703                                                                                         |
| μ / mm <sup>-1</sup>                        | 9.57                                                                                          |
| Crystal dimensions / mm                     | 0.24 × 0.16 × 0.09                                                                            |
| Reflections collected                       | 81423                                                                                         |
| Independent reflections (R <sub>int</sub> ) | 9350                                                                                          |
| GOF                                         | 0.99                                                                                          |
| R1, wR2 [I > 3σ(I)]                         | 0.061, 0.165                                                                                  |
| R1, wR2 (all data)                          | 0.0863, 0.165                                                                                 |
| Res. el. dens. (e Å <sup>-3</sup> )         | 1.20, -1.82                                                                                   |
| CCDC number                                 | 1423655                                                                                       |

Figure. S1. IR spectra of trinuclear Pd complex

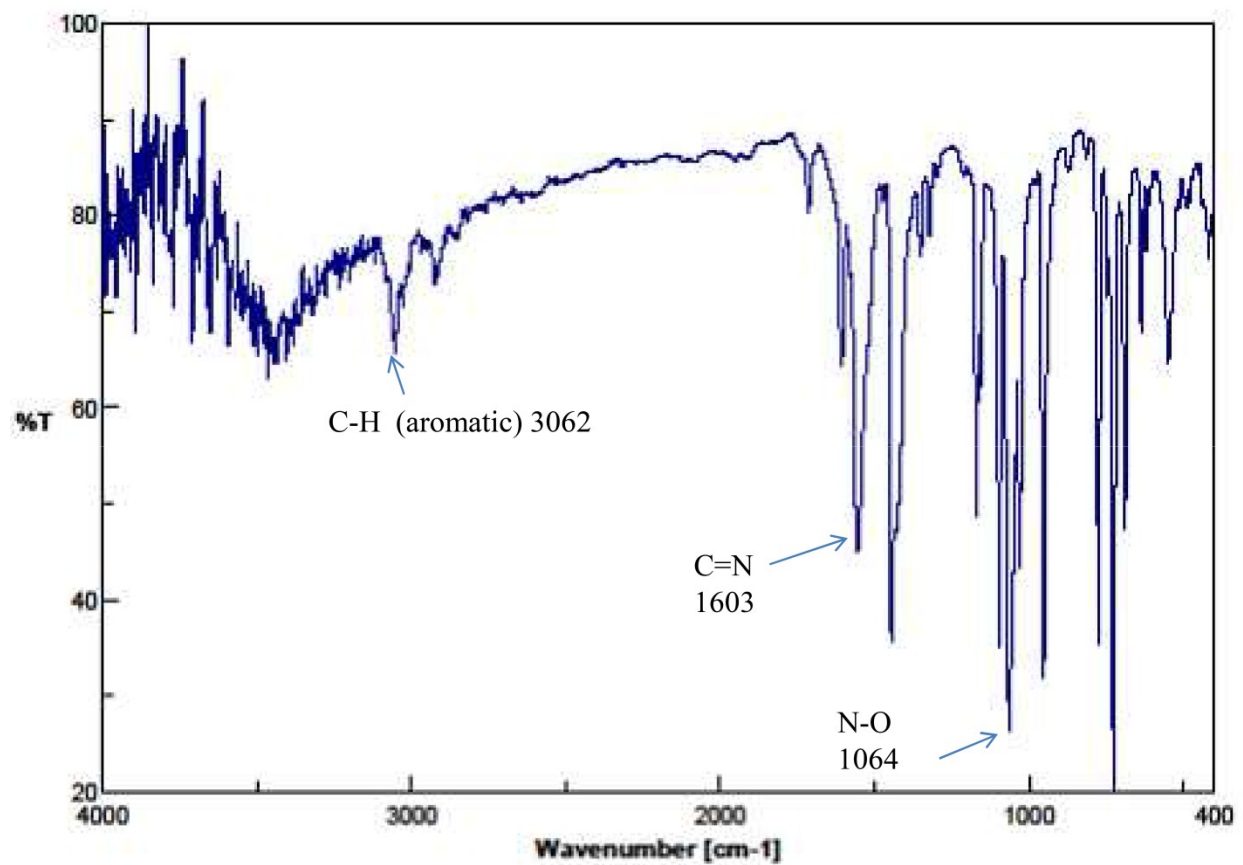

**Figure. S2.**  $^1\text{H}$ -NMR spectra of trinuclear Pd complex in  $\text{CDCl}_3$ .

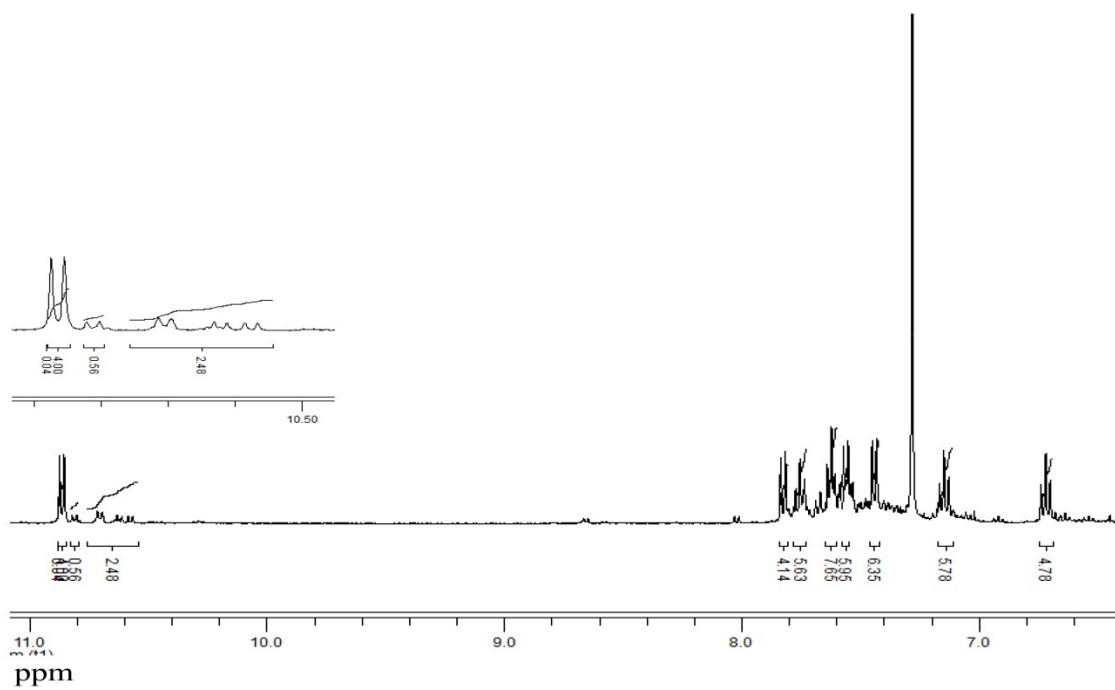

**Figure. S3.**  $^{13}\text{C}\{^1\text{H}\}$ -NMR spectra of trinuclear Pd complex in  $\text{CDCl}_3$ .

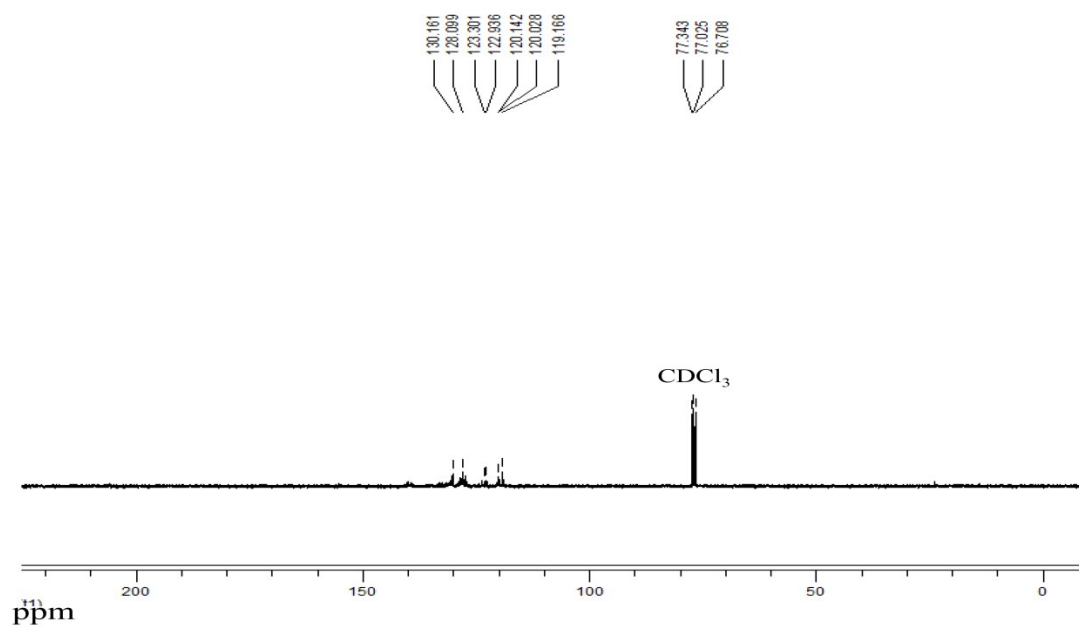

Supplement: c6ra08744b1.pdf [file c6ra08744b1.pdf]
